# Supplementary material for: Incorporating QM and solvation into docking for applications to GPCR targets
Source: Royal Society of Chemistry journal article supplement (doi:10.1039/c6cp04742d), 2016-01-01
Supplement: c6cp04742d1.pdf [file c6cp04742d1.pdf]

## Supplementary information

### SI 1. SCF iterations and energy convergence

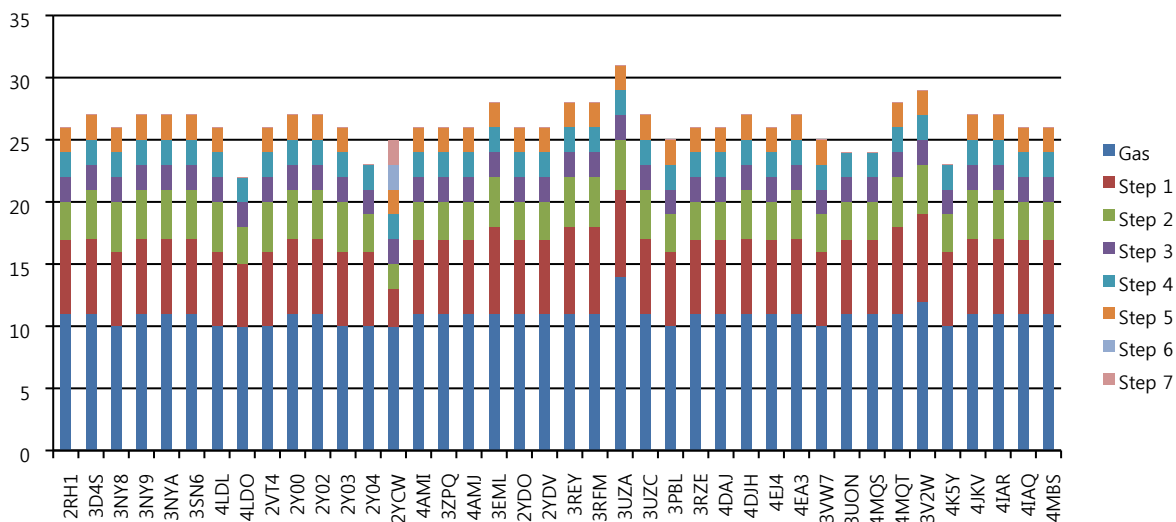

**Figure 1.** Number of iterations for each step of solvation QM/MM charge calculations. After gas phase QM/MM calculations, in all cases except for 2YCW, which took 7 steps, the calculations were terminated in 5 steps.

### Energy convergence plot of XAC (ligand for 3REY)

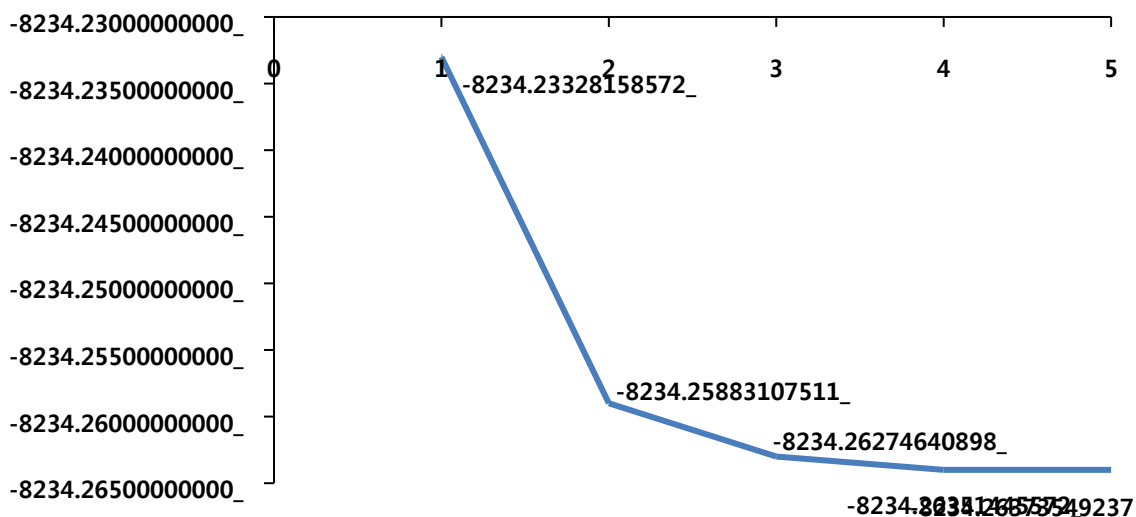

**Figure 2.** Plot of energy vs. iteration step for 3REY charge calculations. The criterion of convergence was set to  $5e-05$  hartree.

## SI2. Intermediate values of SolvQMDock calculation for 3REY

**Table 1.** Initial poses generated by SolvQMDock

|                                                | Pose 1 | Pose 2 | Pose 3 | Pose 4 | Pose 5 | Pose 6 | Pose 7 | Pose 8 | Pose 9 | Pose 10 |
|------------------------------------------------|--------|--------|--------|--------|--------|--------|--------|--------|--------|---------|
| Initial docking RMSD                           | 4.012  | 3.748  | 8.569  | 4.093  | 6.799  | 8.341  | 9.608  | 1.249  | 10.957 | 12.125  |
| The number of iterations in Gas (SCF)          | 11     | 11     | 12     | 11     | 11     | 11     | 12     | 11     | 11     | 11      |
| The number of iterations in solvation (Step 1) | 7      | 7      | 7      | 7      | 7      | 7      | 7      | 7      | 7      | 7       |
| Step 2                                         | 4      | 4      | 4      | 4      | 4      | 4      | 4      | 4      | 4      | 4       |
| Step 3                                         | 2      | 2      | 2      | 2      | 2      | 2      | 3      | 3      | 3      | 3       |
| Step 4                                         | 2      | 2      | 2      | 2      | 2      | 2      | 2      | 2      | 2      | 2       |
| Step 5                                         | 2      | 2      | 2      | 2      | 2      | 2      | 2      | 2      | 2      | 2       |
| Ecvdw energy                                   | -39.5  | -32.1  | -39.8  | -37.9  | -42.4  | -36.1  | -43.8  | -45.3  | -42.4  | -43.7   |
| RMSD of subsequent docking                     | 8.320  | 8.385  | 8.371  | 4.200  | 4.990  | 9.070  | 8.450  | 1.243  | 9.565  | 9.070   |

**Table 2.** Charge values on atoms of XAC (ligand for 3REY)

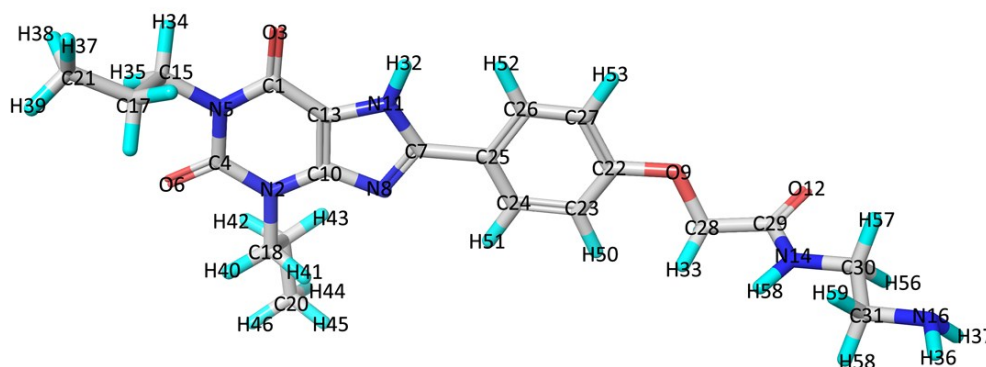

|     | Force Field | Pose 1 | Pose 2 | Pose 3 | Pose 4 | Pose 5 | Pose 6 | Pose 7 | Pose 8 | Pose 9 | Pose 10 |
|-----|-------------|--------|--------|--------|--------|--------|--------|--------|--------|--------|---------|
| C1  | 0.746       | 0.806  | 1.542  | 0.665  | 1.442  | 0.753  | 0.458  | 1.146  | 1.309  | 0.526  | 1.004   |
| N2  | -0.257      | -0.839 | -0.921 | -0.355 | -0.793 | -0.971 | -0.488 | -0.220 | -1.178 | -0.244 | 0.128   |
| O3  | -0.508      | -0.584 | -0.776 | -0.639 | -0.810 | -0.573 | -0.507 | -0.696 | -0.766 | -0.578 | -0.673  |
| C4  | 0.753       | 1.073  | 1.670  | 0.307  | 1.331  | 0.903  | 0.743  | 0.773  | 1.471  | 0.767  | 0.758   |
| N5  | -0.295      | -0.606 | -1.440 | -0.344 | -1.352 | -0.328 | -0.406 | -1.214 | -1.290 | -0.464 | -0.683  |
| O6  | -0.508      | -0.647 | -0.738 | -0.469 | -0.703 | -0.618 | -0.576 | -0.581 | -0.745 | -0.616 | -0.523  |
| C7  | 0.353       | 0.187  | 0.004  | 0.164  | 0.682  | 0.760  | 0.715  | 0.649  | 0.310  | 0.719  | 0.664   |
| N8  | -0.563      | -0.695 | -0.621 | -0.486 | -0.695 | -0.950 | -0.765 | -0.765 | -0.740 | -0.497 | -0.042  |
| O9  | -0.285      | -0.651 | -0.797 | -0.480 | -0.360 | -0.280 | -0.412 | -0.369 | -0.499 | -0.454 | -0.758  |
| C10 | 0.345       | 1.082  | 1.258  | 0.215  | 0.767  | 0.944  | 0.519  | 0.859  | 1.051  | 0.108  | -0.120  |

|     |        |        |        |        |        |        |        |        |        |        |        |
|-----|--------|--------|--------|--------|--------|--------|--------|--------|--------|--------|--------|
| N11 | -0.257 | 0.163  | 0.498  | -0.613 | -0.282 | -0.502 | -0.831 | -0.487 | 0.065  | -0.795 | -0.563 |
| O12 | -0.500 | -0.530 | -0.513 | -0.614 | -0.718 | -0.619 | -0.669 | -0.602 | -0.763 | -0.646 | -0.631 |
| C13 | -0.214 | -0.742 | -1.195 | 0.160  | -0.595 | -0.393 | 0.214  | -0.498 | -0.706 | 0.215  | -0.178 |
| N14 | -0.500 | 0.030  | -0.250 | -0.688 | -0.450 | -0.987 | -0.192 | -0.402 | -1.165 | -0.701 | 0.739  |
| C15 | -0.070 | 0.404  | 0.717  | 0.277  | 1.221  | -1.009 | 0.092  | 1.123  | 1.169  | 0.090  | -0.287 |
| N16 | -0.900 | -1.293 | -1.115 | -1.239 | -1.004 | -1.115 | -1.250 | -1.146 | -0.862 | -1.214 | -1.099 |
| C17 | -0.120 | -0.829 | -0.453 | -0.368 | -0.540 | 0.772  | -0.341 | 0.291  | -0.717 | 0.018  | 0.659  |
| C18 | -0.070 | -0.108 | -0.228 | 0.648  | 0.149  | 0.612  | 0.051  | -0.366 | 0.878  | -0.061 | -0.757 |
| C19 | -0.120 | 0.555  | -0.521 | 0.433  | -0.639 | -0.156 | -0.319 | 0.296  | -0.765 | 0.086  | 0.395  |
| C20 | -0.180 | -1.068 | 0.013  | -1.157 | 0.457  | -0.138 | 0.020  | 0.419  | -0.170 | -0.208 | 0.155  |
| C21 | -0.180 | 0.302  | 0.427  | -0.374 | -0.230 | -0.699 | 0.037  | 0.447  | 0.292  | -0.175 | -0.082 |
| C22 | 0.085  | 0.600  | 0.642  | 0.554  | 0.204  | -0.060 | 0.511  | 0.173  | 0.270  | 0.509  | 0.756  |
| C23 | -0.115 | -0.233 | -0.308 | -0.320 | 0.110  | 0.118  | -0.270 | 0.032  | -0.156 | -0.303 | -0.596 |
| C24 | -0.115 | -0.375 | -0.426 | -0.241 | -0.429 | -0.647 | 0.168  | 0.114  | -0.041 | -0.099 | 0.057  |
| C25 | 0.000  | -0.054 | 0.198  | 0.064  | -0.211 | 0.219  | -0.585 | -0.760 | 0.082  | -0.216 | -0.360 |
| C26 | -0.115 | 0.351  | 0.100  | 0.038  | 0.010  | -0.602 | 0.298  | 0.294  | -0.482 | -0.009 | 0.037  |
| C27 | -0.115 | -0.559 | -0.525 | -0.213 | -0.220 | 0.492  | -0.341 | -0.331 | -0.041 | -0.371 | -0.486 |
| C28 | 0.140  | 0.512  | 0.985  | 0.017  | -0.064 | -0.280 | -0.068 | 0.114  | 0.439  | 0.032  | 0.309  |
| C29 | 0.500  | 0.200  | 0.072  | 0.568  | 0.767  | 0.781  | 0.618  | 0.537  | 0.852  | 0.733  | 0.272  |
| C30 | 0.080  | -0.274 | -0.002 | 0.413  | -0.206 | 0.656  | -0.840 | -0.087 | 0.343  | 0.216  | -1.071 |
| C31 | 0.060  | 0.622  | 0.504  | 0.416  | 0.755  | 0.207  | 0.832  | 0.480  | 0.373  | 0.352  | 0.075  |
| H32 | 0.306  | 0.260  | -0.004 | 0.421  | 0.239  | 0.464  | 0.499  | 0.432  | 0.098  | 0.395  | 0.121  |
| H33 | 0.300  | 0.051  | 0.164  | 0.389  | 0.253  | 0.429  | 0.275  | 0.060  | 0.538  | 0.349  | -0.527 |
| H34 | 0.060  | -0.060 | -0.075 | 0.013  | -0.171 | 0.413  | 0.120  | -0.331 | -0.149 | 0.093  | 0.122  |
| H35 | 0.060  | 0.228  | -0.066 | 0.059  | -0.244 | 0.345  | 0.029  | -0.425 | -0.213 | 0.049  | 0.169  |
| H36 | 0.060  | 0.444  | 0.524  | 0.526  | 0.546  | 0.424  | 0.421  | 0.424  | 0.340  | 0.453  | 0.403  |
| H37 | 0.060  | 0.460  | 0.287  | 0.445  | 0.328  | 0.399  | 0.506  | 0.399  | 0.294  | 0.440  | 0.490  |
| H38 | 0.060  | 0.352  | 0.033  | 0.078  | 0.136  | -0.135 | 0.097  | -0.113 | 0.098  | 0.023  | -0.063 |
| H39 | 0.060  | 0.167  | -0.065 | 0.204  | -0.114 | -0.137 | 0.024  | -0.163 | -0.040 | 0.033  | -0.569 |
| H40 | 0.060  | 0.106  | 0.119  | -0.106 | 0.128  | 0.046  | 0.169  | 0.192  | -0.005 | 0.078  | 0.241  |
| H41 | 0.060  | -0.059 | 0.203  | -0.099 | 0.039  | -0.135 | 0.185  | 0.105  | -0.217 | 0.145  | 0.164  |
| H42 | 0.060  | -0.097 | 0.138  | -0.161 | 0.155  | 0.019  | 0.043  | -0.052 | 0.251  | 0.018  | -0.140 |
| H43 | 0.060  | -0.122 | 0.153  | -0.011 | 0.163  | 0.061  | 0.106  | -0.122 | 0.249  | 0.020  | -0.136 |
| H44 | 0.060  | 0.200  | -0.003 | 0.578  | -0.129 | 0.028  | -0.056 | -0.045 | 0.033  | 0.069  | -0.054 |
| H45 | 0.060  | 0.279  | 0.074  | 0.345  | 0.092  | -0.119 | -0.097 | -0.100 | -0.062 | 0.059  | -0.057 |
| H46 | 0.060  | 0.289  | -0.009 | 0.135  | -0.204 | 0.029  | -0.012 | -0.258 | 0.132  | 0.047  | -0.024 |
| H47 | 0.060  | 0.020  | 0.097  | 0.055  | 0.179  | 0.134  | -0.057 | -0.193 | 0.113  | 0.045  | -0.040 |
| H48 | 0.060  | -0.074 | -0.194 | 0.064  | 0.063  | 0.068  | 0.053  | -0.234 | -0.135 | 0.043  | -0.071 |
| H49 | 0.060  | -0.198 | 0.169  | 0.186  | 0.485  | 0.256  | 0.012  | -0.167 | 0.260  | 0.056  | -0.004 |
| H50 | 0.115  | 0.086  | 0.247  | 0.173  | 0.132  | 0.115  | 0.159  | 0.096  | -0.012 | 0.168  | 0.577  |
| H51 | 0.115  | 0.338  | 0.211  | 0.181  | 0.218  | 0.188  | 0.000  | 0.092  | 0.090  | 0.147  | 0.035  |

|     |       |        |        |        |        |        |        |        |        |        |        |
|-----|-------|--------|--------|--------|--------|--------|--------|--------|--------|--------|--------|
| H52 | 0.115 | -0.349 | 0.059  | 0.122  | 0.076  | 0.286  | 0.047  | 0.060  | 0.244  | 0.120  | 0.107  |
| H53 | 0.115 | 0.244  | 0.142  | 0.106  | 0.051  | -0.162 | -0.045 | 0.202  | 0.167  | 0.184  | 0.245  |
| H54 | 0.030 | 0.033  | -0.312 | 0.057  | 0.034  | 0.196  | 0.136  | -0.059 | -0.225 | 0.071  | 0.019  |
| H55 | 0.030 | -0.120 | -0.054 | 0.135  | 0.078  | 0.267  | 0.097  | 0.029  | 0.038  | 0.092  | -0.063 |
| H56 | 0.060 | 0.161  | 0.130  | -0.125 | 0.204  | -0.104 | 0.374  | 0.101  | 0.163  | 0.032  | 0.337  |
| H57 | 0.060 | -0.025 | -0.057 | 0.007  | 0.049  | -0.094 | 0.253  | 0.138  | -0.012 | 0.054  | 0.225  |
| H58 | 0.060 | -0.076 | -0.082 | -0.061 | -0.363 | 0.008  | -0.219 | -0.067 | -0.043 | 0.035  | 0.351  |
| H59 | 0.060 | -0.030 | -0.013 | -0.036 | -0.113 | 0.021  | -0.045 | 0.042  | -0.025 | -0.039 | -0.007 |

---
